# Supplementary material for: Competition in depleting resource environments shapes the thermal response of population fitness in a disease vector
Source: Research Square preprint supplement (doi:10.21203/rs.3.rs-624494/v1), 2021-06-25
Supplement: Supplementary file 1 [file a1f3698a7849ef2a2deebe8d.pdf]

## Supplementary file 1

### Competition in depleting resource environments shapes the thermal response of population fitness in a disease vector

*Method used to predict fecundity rate for matrix projection models (main text Equation 1)*

We measured each individual's dry mass to the nearest 0.01 mg using a microbalance. Prior to weighing, mosquitoes were dried individually in microcentrifuge tubes containing desiccant-silica gel for a minimum of 14 days. For the temperature-dependent scaling between mass and wing length, we analysed the van Heuvel (1963) dataset. This showed that as temperatures increase from 25 to 34°C, the scaling between mass and wing length changes significantly (figure S1a). Our analysis of the Farjana (Farjana & Tuno 2012) dataset indicated that the scaling between wing length and fecundity changes significantly with temperature but not resource level (figure S1b).

To estimate lifetime fecundity ( $F$  in Equation S1) from mass for mosquitoes that we reared at 22°C at all food densities, we predicted wing length from mass using the mass-to-wing length exponent at 25°C in the van Heuvel (1963) dataset. We used these wing lengths to predict fecundity using the wing length-to-fecundity scaling exponent from the Farjana (Farjana & Tuno 2012;  $n = 264$ ,  $R^2 = 0.87$ ,  $p < 0.001$ ; Equation S1) dataset at their at 20°C.

For mosquitoes that we reared at 26°C, there is no corresponding temperature treatment in the Farjana dataset (Farjana & Tuno 2012), so we first predicted wing length from mass using the mass-to-wing length exponent at 25°C in the van Heuvel (1963) dataset. We then predicted fecundity using the wing length-to-fecundity scaling from the Briegel (1990) dataset at 27°C ( $n = 206$ ,  $R^2 = 0.77$ ,  $p < 0.001$ ; Equation S1). For mosquitoes that we reared at 32 and 34°C, we predicted wing length from mass using the mass-to-wing length exponent at 34°C in the van Heuvel (1963) dataset. We then predicted fecundity for these mosquitoes using the wing length-to-fecundity scaling exponent from the Farjana (Farjana & Tuno 2012; Equation S1) dataset at 30°C. Fecundity was not estimated at 36°C, as no adults emerged at this temperature. **The scaling equations used to estimate temperature-dependent fecundity from wing length for our mosquitoes are:**

$$\begin{aligned} 22^\circ\text{C}, F &= 0.93 + 3.16 \log(L) \\ 26^\circ\text{C}, F &= 0.40 + 3.80 \log(L) \\ 32^\circ\text{C}, F &= 0.26 + 4.08 \log(L) \\ 34^\circ\text{C}, F &= 0.26 + 4.08 \log(L) \end{aligned} \tag{S1}$$

The coefficients were derived from our analysis (figure S1) of the Farjana (Farjana & Tuno 2012) and Briegel (1990) datasets.

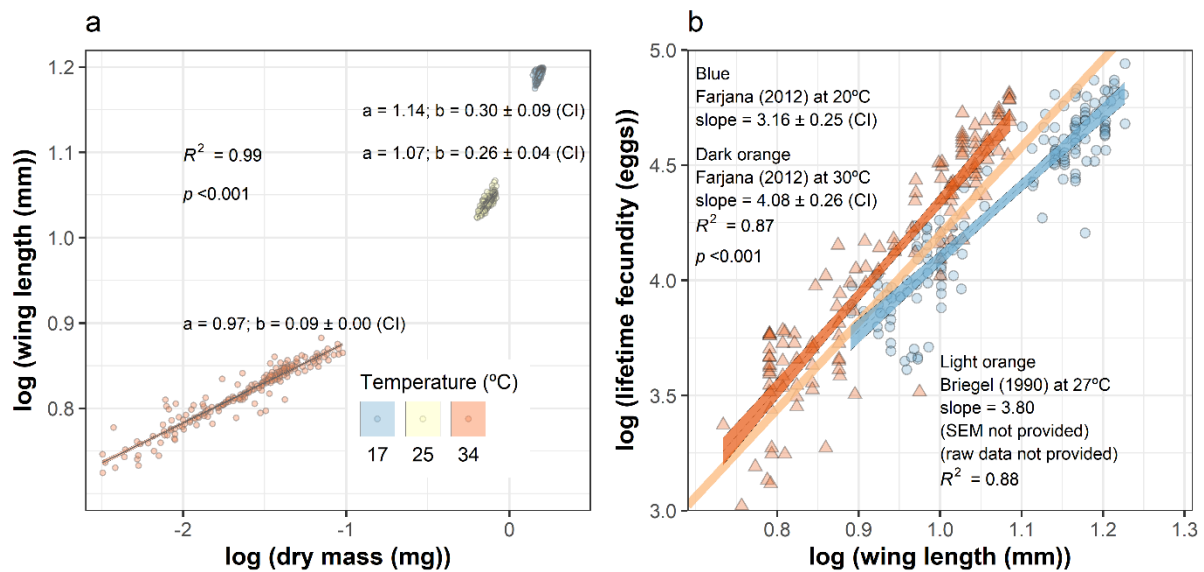

50

51

52 **Figure S1. a, Analysis of the van Heuvel (1963) dataset shows that the scaling of mass and wing length in**  
 53 ***Ae. Aegypti* is temperature-dependent.** The scaling exponents (slopes) for 17°C and 25°C are significantly  
 54 higher than at 34°C. However, the higher scaling exponent for 17°C is non-significantly higher than for 25°C. **b,**  
 55 **Analysis of the Farjana (Farjana & Tuno 2012) dataset shows that the scaling of wing length and fecundity**  
 56 **in *Ae. Aegypti* is temperature-dependent.** The scaling exponents (slopes) for both resource levels are  
 57 significantly higher at 30°C than at 20°C. However, the effect of resource on fecundity is non-significant at the  
 58 temperature level (not shown). The standard error for the scaling exponent at 27°C is not shown because it is not  
 59 provided in (Briegel 1990), so for 26°C, we assumed a similar 95% CI to those in the Farjana (Farjana & Tuno  
 60 2012) dataset ( $3.80 \pm 0.25$ ). Despite these assumptions relating to fecundity, our  $r_m$  calculations are robust to  
 61 uncertainty/variation in the underlying scaling and temperature dependencies (figure 4).

62

63

64

65

66

67

68

69

70

71

72

73

74

75

76

77

78

79

80

81

82

83

84

85

86

| Model terms                                 | Model name         | AIC            | $\Delta$ AIC | df        |
|---------------------------------------------|--------------------|----------------|--------------|-----------|
| <b>Temperature <math>\times</math> RL</b>   | <b>Interaction</b> | <b>6446.77</b> | <b>0</b>     | <b>20</b> |
| Temperature $\times$ RL + replicate + block | Maximal            | 6450.89        | +4.12        | 23        |
| Temperature $\times$ RL + replicate         | No block           | 6448.89        | +2.13        | 22        |
| Temperature + RL                            | No interaction     | 6462.33        | +15.56       | 8         |
| Temperature                                 | Temperature only   | 6481.32        | +34.55       | 5         |
| Resource                                    | Resource only      | 6899.22        | +452.46      | 4         |
| None                                        | Null               | 6906.62        | +459.86      | 1         |

87  
88  
89  
90  
91  
92  
93  
94  
95  
96  
97  
98  
99  
100  
101  
102  
103  
104  
105  
106  
107  
108  
109  
110  
111  
112  
113  
114  
115  
116  
117  
118  
119  
120  
121  
122  
123  
124  
125  
126  
127  
128  
129

**Table S1. Simplification of the exponential juvenile survival model.** The maximal model includes the effects of temperature  $\times$  resource level (RL) + replicate + block on mortality. The final mortality model was obtained by dropping terms from the maximal model. If removing a term worsened model fit ( $\Delta$ AIC  $>$  -2), then it was retained. Otherwise, it was removed.  $\Delta$ AICs were calculated as differences from the interaction model (**bold**).

| Resource level (mg ml <sup>-1</sup> ) | Model name        | AIC    | df |
|---------------------------------------|-------------------|--------|----|
| 0.183                                 | Kamykowski (1986) | -44.43 | 10 |
| 0.183                                 | Lactin2 (1995)    | -42.77 | 11 |
| 0.367                                 | Kamykowski (1986) | -65.53 | 10 |
| 0.367                                 | Lactin2 (1995)    | -67.77 | 11 |
| 0.550                                 | Kamykowski (1986) | -61.31 | 10 |
| 0.550                                 | Lactin2 (1995)    | -63.61 | 11 |
| 0.733                                 | Kamykowski (1986) | -53.82 | 10 |
| 0.733                                 | Lactin2 (1995)    | -56.40 | 11 |

131  
132 **Table S2. Comparison of model fitting for  $r_m$  TPCs by resource level.** We considered several models that  
133 allow for negative values at both cold and hot extremes, including polynomial regression models (quadratic  
134 models underfitted the matrix projection  $r_m$  estimates, whereas cubic models overfitted these estimates (not  
135 shown) and other TPC models (not shown) that are implemented in the `rTPC` R package (Padfield *et al.* 2021).  
136 Overall, the Lactin2 function (1995) and Kamykowski model (1986) best described the matrix projection  
137 estimates according to the Akaike Information Criterion (AIC). Although these models performed similarly  
138 according to their AICs, we chose the Kamykowski model (1986) because it was better at describing the estimated  
139  $r_m$  at our lowest resource level.

140

141

142

### 143 References cited

144

145 Briegel, H. (1990). Metabolic relationship between female body size, reserves, and fecundity of *Aedes aegypti*. *J.*  
146 *Insect Physiol.*, 36, 165–172.

147 Farjana, T. & Tuno, N. (2012). Effect of body size on multiple blood feeding and egg retention of *Aedes aegypti*  
148 (L.) and *Aedes albopictus* (Skuse) (Diptera: Culicidae). *Med. Entomol. Zool.*, 63, 123–131.

149 van den Heuvel, M.J. (1963). The effect of rearing temperature on the wing length, thorax length, leg length and  
150 ovariole number of the adult mosquito, *Aedes Aegypti* (L.). *Trans. R. Entomol. Soc. London*, 115, 197–216.

151 Kamykowski, D. & McCollum, S.A. (1986). The temperature acclimatized swimming speed of selected marine  
152 dinoflagellates. *J. Plankton Res.*, 8, 275–287.

153 Lactin, D.J., Holliday, N.J., Johnson, D.L. & Craigen, R. (1995). Improved rate model of temperature-dependent  
154 development by arthropods. *Environ. Entomol.*, 24, 68–75.

155 Padfield, D., O’Sullivan, H. & Pawar, S. (2021). `rTPC` and `nls.multstart`: A new pipeline to fit thermal performance  
156 curves in `r`. *Methods Ecol. Evol.*, 2021, 2041–210X.13585.

157

158

159

160

161

162

163

164

165

166
